# Supplementary material
Source: PubMed Central journal article supplement (PMC3602885)
Supplement: 97320630009169S1.pdf [file 97320630009169S1.pdf]

## Supplementary material:

**Table 1:** Enzyme kinetics of glk A

| S.NO | Source of glk A                                  | Enzyme Activity ( $\mu\text{M}/\mu\text{g}/\text{ml}$ ) | $V_{max}$ ( $\mu\text{M}/\text{ml}/\text{min}$ ) | $K_m$ ( $\mu\text{M}$ ) | Hill Coefficient $S_{0.5}$ (mM) |
|------|--------------------------------------------------|---------------------------------------------------------|--------------------------------------------------|-------------------------|---------------------------------|
| 1    | Cytosolic fraction of <i>S. aureus</i> ATCC12600 | 0.1053 $\pm$ 0.01                                       | 2.24 $\pm$ 0.06                                  | 5.22 $\pm$ 0.17         | 1.71 $\pm$ 0.025                |
| 2    | rglk A                                           | 0.20817 $\pm$ 0.04                                      | 2.19 $\pm$ 0.05                                  | 5.1 $\pm$ 0.06          | 1.66 $\pm$ 0.032                |

Values are the mean $\pm$  SD from three determinations

**Table 2:** Enzyme kinetics comparison of *S. aureus* glk A with other bacterial and human glk A

| S.NO | Source of glk A                   | $K_m$   | References           |
|------|-----------------------------------|---------|----------------------|
| 1    | <i>E. coli</i> K-12               | 0.78mM  | [16]                 |
| 2    | <i>Ranibacterium salmoninarum</i> | 0.266mM | [17]                 |
| 3    | <i>Bacillus subtilis</i>          | 0.24mM  | [18]                 |
| 4    | <i>Bacillus sphaericus</i>        | 0.31mM  | [19]                 |
| 5    | Human                             | 7.234mM | [20]                 |
| 6    | <i>S. aureus</i>                  | 5.22 mM | In the present study |
